# Supplementary material
Source: Springer Nature journal article supplement (https://www.springermedizin.de/resource/supplementary/12885_2010_2451_MOESM1_ESM.pdf/9461330)

**A**

### Immunohistochemical determination of p-Smad2

**Intensity score 3**

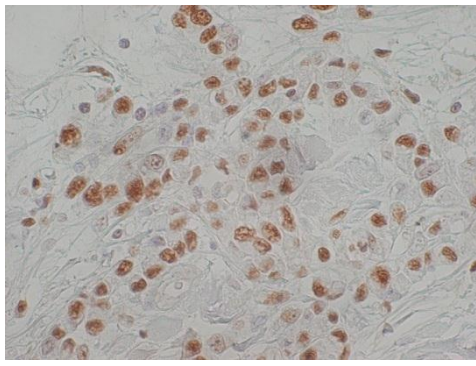

**Intensity score 2**

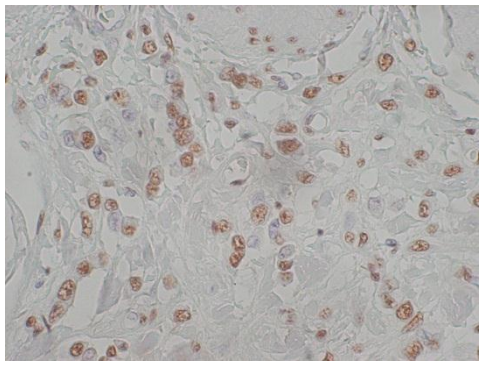

**Intensity score 1**

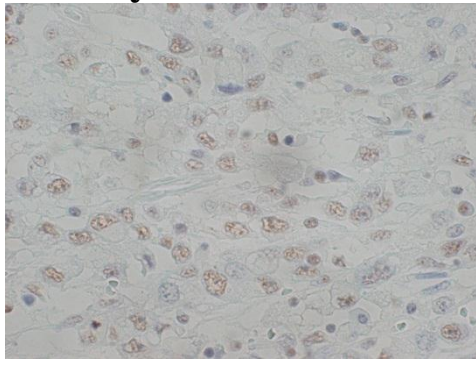

**B**

### The overall survival of patients based on p-Smad2 expression

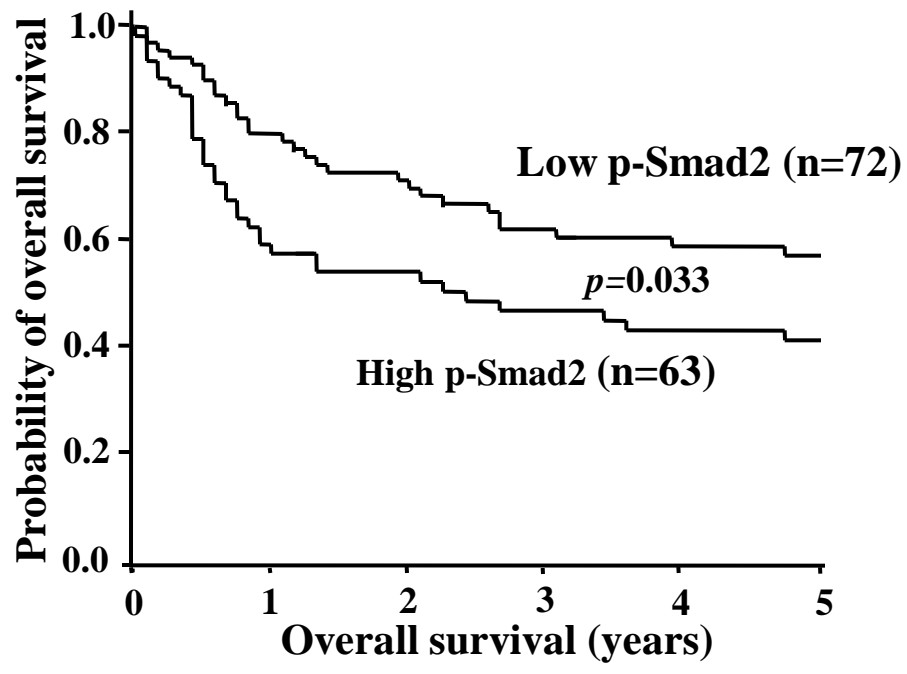

Supplement: MOESM1 [file 9461330]
